# Supplementary material
Source: HighWire-hosted journal article supplement (https://bibliotheek.ehb.be/content/29/5/570)
Supplement: inline-supplementary-material-1 [file inline-supplementary-material-1.pdf]

## Supplementary Material

**Title:** Active Smoking, Secondhand Smoke Exposure, and Serum Cotinine Levels among Cheyenne River Sioux Communities in Context of a Tribal Public Health Policy

**Authors:** Elena R. O'Donald, Ph.D., Curtis P. Miller, Ph.D., Rae O'Leary, R.N., Jennifer Ong, B.S., Bernadette Pacheco, B.S., Kathryne Foos, Kendra Enright, R.N., Marcia O'Leary, R.N., Patricia Nez Henderson, M.D., M.P.H., Johnnye Lewis, Ph.D., Esther Erdei, Ph.D., M.P.H., Jeffrey A. Henderson, M.D., M.P.H.

## SMOKING INFORMATION QUESTIONNAIRE

The Cheyenne River Sioux Tribe, The Black Hills Center for American Indian Health, and University of New Mexico are doing a study about the health effects of mercury in people's bodies.

We would like to ask you some questions related to smoking habits to be able to determine your eligibility in this study.

**Do you smoke currently?**

YES

NO

**How many cigarettes do you smoke per day?**

1-5

6-10

11-20

More than 20

**Do you use smokeless tobacco, snuff or dip for chewing?**

YES

NO

**Does anyone in your home smoke any cigarettes, pipe, etc.**

YES

NO

If yes, continue with next question:

**How many cigarettes do others smoke in your home per day?**

1-5

6-10

11-20

More than 20

**Did your parents or others in your home smoke when you were a child?**

YES

NO

**Is there tobacco smoking at your workplace?**

YES

NO

**Do you routinely spend time in a smoky environment while you are off work, on holidays or during the weekends?**

YES

NO

**Supplementary Table S1.** CRST participants' serum cotinine concentrations by selected tobacco-related and demographic variables

|                                             | N (%)     | Mean ( $\pm$ SD)<br>cotinine [ng/ml] | Median (min; max)<br>cotinine [ng/ml] | p Value <sup>#1</sup> |
|---------------------------------------------|-----------|--------------------------------------|---------------------------------------|-----------------------|
| Current CoSHS<br>among non-tobacco<br>users |           |                                      |                                       |                       |
| Yes                                         | 35 (15.5) | 18.1 (55)                            | 2.7 (0.4; 247.5)                      | 0.4783                |
| No                                          | 53 (23.5) | 15.7 (51.9)                          | 3.5 (0.4; 356.9)                      |                       |

Note. #1 p Values were derived from Wilcoxon rank-sum test for two group's comparison.

**Supplementary Table S2.** Frequencies of CRST participants in selected groups

|                                   | N (%)     | p Value <sup>#1</sup> |
|-----------------------------------|-----------|-----------------------|
| Exposed to CoSHS in               |           |                       |
| 2014 <sup>#2</sup>                | 49 (66.2) | 0.1758                |
| 2015                              | 41 (54.7) |                       |
| 2016                              | 39 (52)   |                       |
| Current smokers in                |           |                       |
| 2014                              | 43 (57.3) | 0.3629                |
| 2015                              | 36 (48)   |                       |
| 2016                              | 35 (46.7) |                       |
| Current tobacco chewers in        |           |                       |
| 2014                              | 15 (20)   | 0.6205                |
| 2015                              | 11 (14.7) |                       |
| 2016                              | 15 (20)   |                       |
| Tobacco users in                  |           |                       |
| 2014                              | 48 (64)   | 0.7846                |
| 2015                              | 45 (60)   |                       |
| 2016                              | 44 (58.7) |                       |
| Exposed to CoSHS among            |           |                       |
| Smokers                           | 85 (74.6) | <0.0001               |
| Non-smokers <sup>#2</sup>         | 44 (40)   |                       |
| Current tobacco chewers in        |           |                       |
| Younger age group                 | 30 (25.4) | 0.0033                |
| Older age group                   | 11 (10.3) |                       |
| Older participants (42-77 y/o) in |           |                       |
| 2014                              | 33 (44)   | 0.4647                |
| 2015                              | 40 (53.3) |                       |
| 2016                              | 34 (45.3) |                       |
| Female participants in            |           |                       |
| 2014                              | 40 (53.3) | 0.576                 |
| 2015                              | 35 (46.7) |                       |
| 2016                              | 41 (54.7) |                       |
| Current anglers/fishermen in      |           |                       |
| 2014                              | 56 (74.7) | 0.6978                |
| 2015                              | 56 (74.7) |                       |
| 2016                              | 52 (69.3) |                       |

Note. #1 p Values were derived from Chi-Square and Fisher's Exact tests.

#2 Missing CoSHS data for 1 participant.

Plots on other QRMs that considered age as a continuous variable or dose of daily cigarette consumption are shown in Supplementary Figures S1 and S2, respectively. The QRM with the continuous age variable included the same other predictor covariates as the original model (Table 2).

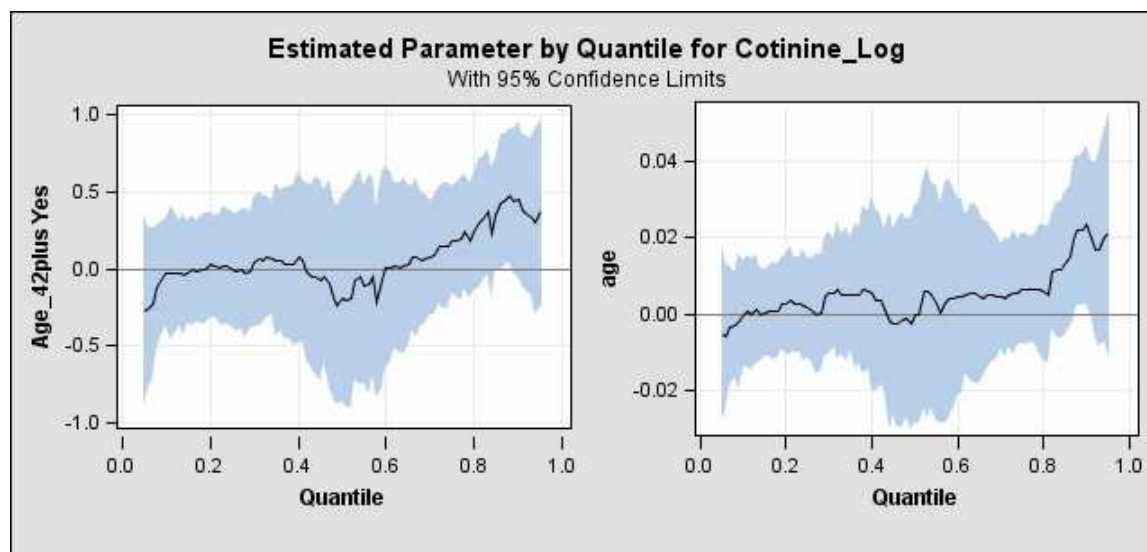

**Supplementary Figure S1.** QRM estimated parameters by quantile for serum cotinine natural log (with 95% CI): age group (on the left) and continuous age in years (on the right) - the comparison of the two modeling approaches.

The model that considered smoking dose instead of current smoking status used the same set of predictors that were used in the original model (Table 2), except the following: current smoking status was replaced with categories of daily cigarette use, the binary "SHS exposure at work" variable was utilized instead of CoSHS, and interaction between smoking and chewing was omitted from the model. This was done because the categories of daily cigarette use were highly correlated with CoSHS.

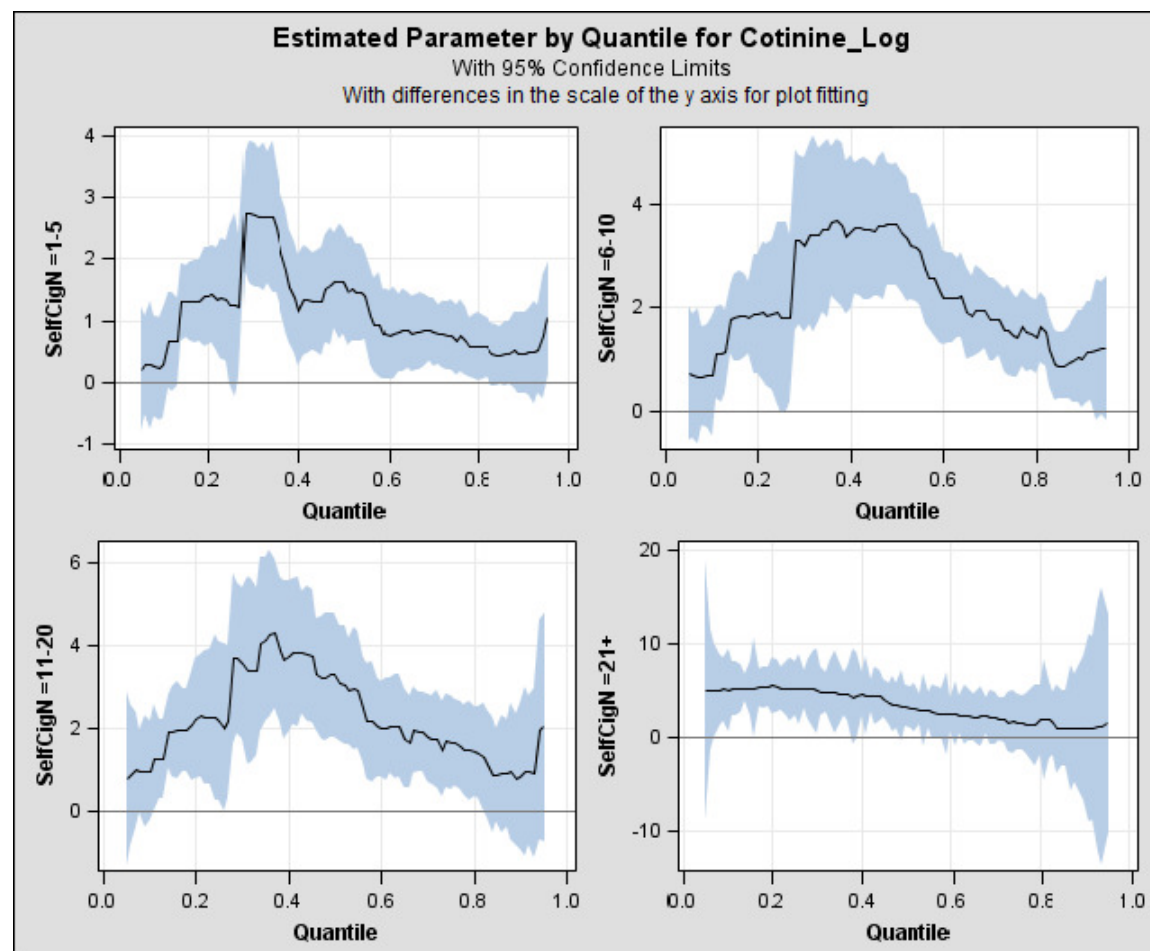

**Supplementary Figure S2.** QRM estimated parameters by quantile for serum cotinine natural log (with 95% CI): serum cotinine changes with respect to daily dose of commercial cigarette consumption.
